# Supplementary material
Source: publisher site journal article supplement (https://www.dovepress.com/get_supplementary_file.php?f=506547.xlsx)
Supplement: Supplementary file 1 [file get_supplementary_file.php]

## Sheet: Supplementary Table 1 SNPs asso
Supplementary Table 1 SNPs associated with confounding factors
RS Number	GWAS Trait	PMID	Position (GRCh37)	Alleles	R2	D'	P-value
rs12731986	Sunburns	30595370	chr1:73715233	C=0.53, T=0.47	0.412753	0.776632	4e-11
rs28732378	Sunburns	30595370	chr3:85787399	A=0.221, G=0.779	0.462332	0.799434	3e-11
rs26579	Sunburns	30595370	chr5:87968864	A=0.713, G=0.287	0.501851	0.993795	2e-08

## Sheet: Supplementary Table 2
Supplementary Table 2 SNPs were selected as instrumental variables
undersleepers						ever smoked						alcohol consumption						sedentary behaviour duration
SNP	other_allele.exposure	effect_allele.exposure	beta.exposure	se.exposure	pval.exposure	SNP	other_allele.exposure	effect_allele.exposure	beta.exposure	se.exposure	pval.exposure	SNP	other_allele.exposure	effect_allele.exposure	beta.exposure	se.exposure	pval.exposure	SNP	other_allele.exposure	effect_allele.exposure	beta.exposure	se.exposure	pval.exposure
rs1380703	A	G	0.00956103	0.00197165	1.2e-06	rs183771907	A	T	-0.0273	0.0059	4.34e-06	rs11577305	C	G	-0.1701	0.0306	2.75e-08	rs61776614	C	T	0.0497396	0.0090537	3.2e-08
rs62158211	G	T	-0.0104415	0.00222937	2.8e-06	rs2782641	G	A	0.0108	0.0022	6.45e-07	rs412698	T	C	-0.1201	0.0249	1.39e-06	rs3927683	A	G	0.0212435	0.00469612	2.2e-06
rs112287772	T	C	0.0375945	0.00785578	1.7e-06	rs11211176	G	A	0.0108	0.0021	4.64e-07	rs12070259	T	C	-0.1494	0.0322	3.64e-06	rs12741347	C	G	-0.0230417	0.00472218	2.9e-06
rs9474974	C	G	-0.00840218	0.00183909	4.9e-06	rs184203930	C	T	0.0166	0.0036	2.81e-06	rs142896482	A	G	-0.299	0.0516	6.66e-09	rs75641275	A	C	-0.0352213	0.00666516	4.4e-07
rs1456031	T	C	0.00889474	0.0018397	1.3e-06	rs12725078	G	T	0.0109	0.0023	3.19e-06	rs140479646	T	C	-0.297	0.0644	4.01e-06	rs72711500	T	A	-0.0230611	0.0048084	2.8e-07
rs66501154	A	G	-0.0108628	0.00218447	6.6e-07	rs149465607	C	T	0.0491	0.0098	4.95e-07	rs12138978	G	A	-0.2999	0.0573	1.66e-07	rs10916119	G	A	0.0339619	0.00664394	3.5e-07
rs5785544	T	TC	0.00854071	0.00184668	3.7e-06	rs960038	C	G	0.0103	0.0022	1.89e-06	rs75944240	T	C	-0.3301	0.0714	3.8e-06	rs4953413	T	C	0.0250103	0.0047902	1.9e-07
rs34219621	G	C	-0.0133673	0.00292502	4.9e-06	rs62136907	G	C	0.0216	0.0045	1.66e-06	rs112829384	G	A	-0.2558	0.056	4.95e-06	rs113851554	G	T	-0.0472852	0.0103987	3.6e-06
rs10510128	G	A	-0.0110483	0.00226025	1e-06	rs55986781	C	T	-0.019	0.0038	6.75e-07	rs79848475	G	A	-0.1909	0.0385	7.15e-07	rs62158206	T	C	0.0269893	0.00560279	1.5e-06
rs11607779	C	T	0.0228825	0.00476526	1.6e-06	rs72853515	T	C	-0.0491	0.0105	2.84e-06	rs72788189	T	C	-0.134	0.0288	3.17e-06	rs145106036	C	CCTCTCTCT	0.0259604	0.00527541	2e-06
rs7483691	C	T	0.0101025	0.00201195	5.1e-07	rs9287372	A	G	-0.0148	0.0021	4.05e-12	rs116749806	G	C	-0.2437	0.0492	7.35e-07	rs34446389	A	AT	0.0207251	0.00463556	3.6e-06
rs150632664	T	TGA	-0.0172696	0.00346822	6.4e-07	rs76641630	G	T	-0.0236	0.0046	3.41e-07	rs10199920	A	G	-0.1925	0.0419	4.25e-06	rs10209768	C	T	-0.0738519	0.0158779	9.4e-07
rs116988821	G	A	0.0242705	0.00528617	4.4e-06	rs141812086	A	G	-0.0496	0.0102	1.12e-06	rs111529366	G	A	-0.2515	0.0515	1.02e-06	rs34910	T	G	0.0267306	0.00521478	2.5e-07
rs8008258	C	T	0.00853056	0.00184007	3.6e-06	rs4145977	C	CT	0.0155	0.0032	1.63e-06	rs149708670	A	G	-0.2353	0.0453	2.08e-07	rs1858242	A	G	0.0312653	0.00530407	4.5e-09
rs140450540	G	A	0.0379637	0.00772125	8.8e-07	rs6726168	C	T	-0.0282	0.0061	3.34e-06	rs116837196	C	A	-0.2532	0.0489	2.29e-07	rs17790917	A	G	-0.0302228	0.0057557	7.6e-07
rs74500417	A	C	0.0124144	0.00269821	4.2e-06	rs1504058	A	G	-0.0101	0.0021	2.56e-06	rs10931992	C	T	-0.0895	0.0194	3.88e-06	rs732550	T	A	-0.0218821	0.00469234	1.6e-06
						rs17677553	C	T	-0.0428	0.0089	1.48e-06	rs73015939	C	T	-0.1246	0.0273	4.93e-06	rs737600	A	G	-0.0241656	0.00466157	1.4e-07
						rs148000909	G	A	0.0302	0.0065	3.27e-06	rs149081784	C	T	-0.2459	0.0461	9.81e-08	rs34114890	C	CT	-0.0415252	0.00833867	3e-07
						rs846184	C	T	0.0179	0.0032	1.54e-08	rs76457619	C	T	-0.2674	0.0565	2.25e-06	rs25981	G	C	0.0277534	0.00466676	4.9e-09
						rs59529658	T	C	-0.0135	0.0029	2.59e-06	rs9884852	T	C	-0.0911	0.0189	1.39e-06	rs10663956	C	CTTAA	-0.0249622	0.00469938	1.1e-07
						rs7627887	T	A	0.0101	0.0021	2.06e-06	rs115616389	C	T	-0.3463	0.0597	6.46e-09	rs1198346	C	T	0.0234687	0.00486756	5.1e-07
						rs1484258	T	C	-0.0117	0.0023	5.43e-07	rs78405192	T	C	-0.195	0.0392	6.43e-07	rs16890617	T	C	-0.037543	0.00810799	3.8e-06
						rs189964787	C	T	-0.0196	0.0042	3.44e-06	rs1229984	T	C	0.3878	0.0834	3.35e-06	rs116915110	G	A	0.048231	0.0109485	2.6e-06
						rs2899132	T	A	0.0147	0.0032	4.23e-06	rs72681244	T	C	-0.3222	0.0628	2.88e-07	rs189695099	G	C	0.0944514	0.0203165	2.6e-06
						rs1397440	T	C	0.0112	0.0022	6.74e-07	rs150550246	T	C	-0.2749	0.06	4.67e-06	rs11487196	G	A	-0.0244599	0.00563618	3.9e-06
						rs13359614	C	T	-0.0148	0.0028	1.85e-07	rs2097675	A	G	-0.0814	0.0173	2.59e-06	rs117684807	G	A	-0.0890527	0.0199397	3.1e-06
						rs34616059	TA	T	-0.0137	0.003	4.97e-06	rs75042965	C	T	-0.2537	0.0549	3.86e-06	rs2138756	G	A	0.0271256	0.004692	9e-10
						rs116611819	C	T	0.0427	0.0093	4.29e-06	rs146313255	G	A	-0.2057	0.0407	4.41e-07	rs17703801	A	G	0.0463982	0.0105651	2e-06
						rs2531804	A	G	-0.0103	0.0022	3.11e-06	rs114885941	G	A	-0.1779	0.0365	1.06e-06	rs6474006	C	T	0.022339	0.00478335	2e-06
						rs1269556	C	T	-0.0142	0.0028	4.39e-07	rs189095999	G	A	-0.283	0.0597	2.11e-06	rs34064803	T	C	0.0356944	0.00780427	1.4e-06
						rs7453875	A	T	0.0156	0.003	1.9e-07	rs115753765	C	T	-0.188	0.0407	3.75e-06	rs10887455	A	T	-0.0217835	0.00464564	1.1e-06
						rs4945881	G	A	0.0134	0.0027	4.29e-07	rs145196801	G	A	-0.2639	0.0555	2.02e-06	rs141526703	G	A	0.0612354	0.0138051	3.6e-06
						rs10267898	C	T	-0.018	0.0037	1.44e-06	rs113935952	T	A	-0.2949	0.0599	8.47e-07	rs12785741	G	C	-0.022864	0.00495663	3.3e-06
						rs2190324	C	T	-0.015	0.0033	4.88e-06	rs140338175	A	G	-0.3296	0.0681	1.31e-06	rs67309388	T	C	0.0268182	0.00567138	4.4e-06
						rs76578745	A	G	0.0213	0.0045	2.13e-06	rs147147749	G	A	-0.1469	0.0308	1.77e-06	rs9548984	A	T	0.0224244	0.00466411	5.6e-07
						rs2331300	G	A	-0.0112	0.0023	1.88e-06	rs73468708	C	T	-0.208	0.0433	1.56e-06	rs7317533	T	A	-0.035572	0.00796648	1e-06
						rs34174742	T	A	-0.0136	0.0028	8.52e-07	rs77089642	G	A	-0.2519	0.046	4.44e-08	rs61994756	T	G	-0.102349	0.0227831	4.4e-07
						rs79842063	T	C	0.0403	0.0088	4.18e-06	rs6927296	G	C	-0.1471	0.0318	3.77e-06	rs75779711	C	A	-0.0355875	0.00689779	8e-07
						rs884897	G	A	0.0128	0.0026	5.32e-07	rs676371	T	C	0.3197	0.0597	8.41e-08	rs12446623	T	G	0.0319317	0.00661362	2.6e-06
						rs7805703	T	C	0.0099	0.0021	2.77e-06	rs2064307	C	T	-0.1976	0.0427	3.77e-06	rs4782526	T	G	-0.0228744	0.00489298	3.3e-06
						rs11786914	C	A	-0.0239	0.0051	2.65e-06	rs62427717	G	A	-0.1997	0.0419	1.89e-06	rs57521363	A	G	0.0240542	0.00484469	5.2e-07
						rs7829715	T	C	-0.0125	0.0021	4.12e-09	rs34127554	T	A	-0.1459	0.0318	4.64e-06	rs1212167	A	G	0.0257991	0.00510432	4.2e-07
						rs6985074	A	T	-0.0114	0.0021	7.35e-08	rs2860555	T	C	0.1887	0.0384	9.04e-07	rs12455052	A	C	-0.0243355	0.00515023	1.9e-06
						rs7818296	T	C	-0.0153	0.0032	1.3e-06	rs377629956	C	CTCCCAGT	-0.2913	0.0629	3.63e-06	rs4804930	C	T	-0.0419714	0.00861004	6.1e-07
						rs117610755	A	G	0.0508	0.0107	1.93e-06	rs6464885	C	G	-0.2047	0.0387	1.24e-07	rs34722177	T	G	-0.0499993	0.0106938	2.9e-06
						rs11139601	C	T	0.0102	0.0022	3.2e-06	rs28664838	T	A	0.0895	0.0182	8.89e-07	rs6012549	A	G	-0.0237913	0.00534068	1.4e-06
						rs144322548	T	G	0.0407	0.0083	1.1e-06	rs142080835	A	G	-0.3252	0.0561	6.85e-09	rs148312404	A	ATTTT	0.0677428	0.0129996	9e-08
						rs190358712	C	T	-0.0439	0.0088	6.73e-07	rs7824502	A	G	0.089	0.0193	4.22e-06	rs151094419	C	T	-0.0977004	0.0213221	2.5e-06
						rs1680635	G	A	0.0112	0.0023	1.05e-06	rs17735981	T	C	-0.2397	0.0509	2.48e-06
						rs10510025	C	T	0.0113	0.0024	3.56e-06	rs113620984	C	T	-0.2951	0.0607	1.16e-06
						rs117242986	A	G	-0.0495	0.0106	2.81e-06	rs117845681	C	T	-0.3248	0.0665	1.05e-06
						rs11224859	T	C	0.0113	0.0024	1.64e-06	rs10963070	C	G	-0.1339	0.0283	2.13e-06
						rs2011487	C	A	-0.0142	0.0021	3.96e-11	rs138060860	G	A	-0.2299	0.0455	4.36e-07
						rs1075790	C	A	-0.0111	0.0023	1.34e-06	rs141495509	C	G	-0.2489	0.0471	1.25e-07
						rs117063023	G	A	0.0236	0.0049	1.7e-06	rs373350873	C	G	-0.1749	0.0354	7.57e-07
						rs11171791	T	C	0.0242	0.0052	3.54e-06	rs200498720	TA	T	0.3548	0.0632	1.94e-08
						rs2138891	T	G	0.011	0.0023	2.56e-06	rs17785570	G	A	-0.284	0.0595	1.79e-06
						rs34673751	G	A	0.0113	0.0024	2.44e-06	rs138604976	G	A	-0.2387	0.0521	4.61e-06
						rs6490466	G	A	-0.0102	0.0021	1.61e-06	rs117013058	C	T	-0.3433	0.0732	2.77e-06
						rs4245357	A	G	0.0165	0.0034	1.3e-06	rs58895431	G	A	-0.2322	0.0451	2.67e-07
						rs12874797	C	T	-0.0194	0.0034	1.06e-08	rs76633582	A	C	-0.218	0.0437	6.13e-07
						rs7141014	T	C	0.0122	0.0027	4.95e-06	rs11041244	A	G	-0.2554	0.0552	3.65e-06
						rs281276	A	G	0.0131	0.0029	4.25e-06	rs75730867	A	G	-0.2995	0.0643	3.25e-06
						rs1551972	C	T	-0.0486	0.0093	1.81e-07	rs12789538	C	T	-0.213	0.0446	1.81e-06
						rs2203348	G	A	-0.012	0.0026	4.33e-06	rs3099799	A	C	0.095	0.0175	5.28e-08
						rs10502592	T	C	-0.0153	0.0033	4.24e-06	rs140220420	C	A	-0.1862	0.039	1.75e-06
						rs7259724	A	G	0.0135	0.0028	1.35e-06	rs141039682	T	C	-0.248	0.0541	4.62e-06
						rs138691355	G	C	-0.0426	0.009	2.15e-06	rs9597583	T	C	-0.1061	0.0211	5.25e-07
						rs6517466	T	C	0.0218	0.0045	1.38e-06	rs9542472	G	A	-0.1054	0.0223	2.32e-06
												rs117302830	A	C	-0.2351	0.0447	1.46e-07
												rs11621414	T	C	-0.1209	0.024	4.73e-07
												rs117797427	G	A	-0.2324	0.0463	5.16e-07
												rs117689555	C	T	-0.1681	0.0343	9.48e-07
												rs139372206	C	T	-0.3021	0.0577	1.66e-07
												rs17759453	G	C	0.0882	0.0187	2.29e-06
												rs76185516	C	T	-0.1693	0.0369	4.45e-06
												rs61740060	T	C	-0.0911	0.0181	4.57e-07
												rs191758331	G	A	-0.2439	0.0472	2.41e-07
												rs4327120	T	C	-0.1219	0.0248	9.03e-07
												rs62101076	A	G	-0.2303	0.0497	3.58e-06
												rs77801261	G	A	-0.178	0.0352	4.36e-07
												rs138546517	C	T	-0.3629	0.0647	2.06e-08
												rs1569968	C	T	-0.1978	0.0432	4.68e-06
												rs116917149	C	A	-0.2477	0.0423	4.81e-09
